# Supplementary material for: Stillbirth surveillance and review in rural districts in Bangladesh
Source: Springer Nature journal article supplement (doi:10.1186/s12884-018-1866-2), 2018-06-12
Supplement: MOESM1 [file 15854204]

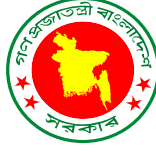

Government of the People's Republic of Bangladesh  
Ministry of Health and Family Planning

**Maternal, Still Birth and Neonatal Death Review (MPDR)**  
(GoB-MNH initiatives)

**Still Birth review Form**  
(Applicable at the community)

**Implementation**

Directorate General of Health Services (DGHS) and  
Directorate General of Family Planning (DGFP)

**Technical Support**

Centre for Injury Prevention and Research, Bangladesh  
(CIPRB)

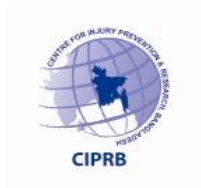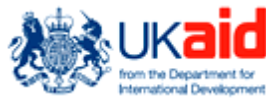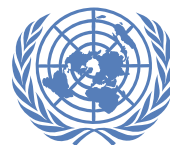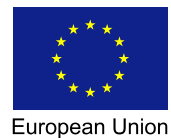

## Consent

Hello, my name is ..... I am working in Health department/ family planning department as ..... You may be happy to know that Directorate General of Health Services (DGHS) and Directorate General of Family Planning (DGFP) are working together in Thakurgaon district to identify and review all maternal and perinatal death which helps to improve health status in Bangladesh. As a part of this I would like to ask some questions and discuss with you about still birth. This interview will take 45 minutes approximately. This interview depends upon your wish, you may not answer all questions. Before you give your consent, you may ask any questions and know about the subject of interview. You don't have any risk to participate in the interview. All information related to this will keep confidential. Your name will not be mentioned in the report. The Ministry of Health and Family Planning will learn from your information and that will help to improve maternal and neonatal health status.  
Thanks to you.

From above consideration, if you want to participate in interview, then I will start the session.

If respondent has given consent to participate in the interview:

Name of the respondent: .....

Signature of the respondent:.....

Date of interview: 

|  |  |  |  |  |  |
|--|--|--|--|--|--|
|  |  |  |  |  |  |
|--|--|--|--|--|--|

  
Day / Month / Year

Interview starting time [In 24 hours] 

|  |  |  |  |
|--|--|--|--|
|  |  |  |  |
|--|--|--|--|

Interview end time [In 24 hours] 

|  |  |  |  |
|--|--|--|--|
|  |  |  |  |
|--|--|--|--|

Name of the interviewer:..... Designation.....Code no: 

|  |  |
|--|--|
|  |  |
|--|--|

### **Respondent's Information**

| Name                     | Relation with disease | Sex | Religion | Race | Present during death of mother | When you last time saw (In days) |
|--------------------------|-----------------------|-----|----------|------|--------------------------------|----------------------------------|
| Principal respondent :   |                       |     |          |      |                                |                                  |
| Associate respondent -1: |                       |     |          |      |                                |                                  |
| Associate respondent -2: |                       |     |          |      |                                |                                  |
| Associate respondent -3: |                       |     |          |      |                                |                                  |

**Relation:** 01. Father in law 02.Mother in law 03.Husband 04. Mother 05. Father 06. Grand father/ Grand mother 07. Grand father/ Grand mother (M) 08. dzdz/dzdv 09. Lvjv/Lvjy 10. PvPv/PvPx 11. gvgv/gvgx 12. Elder brother/sister 13. bb`/ fvex/ Rv 14. `ei / fvmyi 15. Neighbourer 16. others (specify ).....

**Sex :** 1. Male 2. Female **Religion:**1. Islam 2. Hindu 3. Buddhist 4. christian **Race:** 1. Non-tribal 2. Tribal

**Presence :** 1. Yes 2. No

## General Information

District..... Upazila..... Union/Ward.....

Village: .....CC..... Code No:     
District / Upazila/ Interviewer's code/ Still birth code

Mother's name: .....

Age of mother (In Years):

Mother's Education:

Husband's name:.....

Age of husband (In years) :

Husband's education :

**Education duration-** (01. 02. 03..... 10..... 12 etc. and if no education then write code 99)

1. Date of death :     
Day / Month / Year

Time (In 24 hours):    
Hour / Minute

2. Did your fetus had movement during initiate of laobur pain?  
 01. yes 02. no 99. Not know

3. When did you last identified fetal movement ? (In hour/ minute )

   
Hour / minute

4. What was the colour of skin during still born ?

01. Normal (pink) 02. Blackish 03. Masserated 99. Not known

5. What was the size of still born?

01. Less than the normal size 02. Normal size 03

6. Sex of stillborn

01. Boy 02. Girl 03. Not understood 99. Not known

7. Accodring to statement, is there any complication occured during pregnancy?  
 (Multiple response)

1. yes 2. no (Mention the underline complications)

*( if no complications then go to ques. 12 and onwards)*

- a. High blood pressure
- b. Diabetes
- c. Antepartum haemorrhage
- d. High fever
- e. Swelling of hand, face and leg
- f. Convulsion ( Eclampsia)
- g. Anaemia
- h. Jaundice
- i. Blurring of vision
- j. Sudden unconciousness
- k. No movement of fetus for logn duration
- l. Other, specify.....

|  |
|--|
|  |
|  |
|  |
|  |
|  |
|  |
|  |
|  |
|  |
|  |
|  |
|  |
|  |
|  |

8. Any treatment received during complication?

|  |
|--|
|  |
|--|

- 1. Yes 2. No

*(if “no” then go to ques. 11 and onwards)*

9. If answer is “yes” then where mother received treatment ? (Multiple response)

- 01. At home 02. Community clinic 03. Union health and family welfate centre
- 04. Upazila Health complex 05. Maternal and child welfare center
- 06. Distrcit or sadar hosapital 07. Medical college hospital 08. Privat clinic
- 09. Privat hospital 10. NGO clinic 11. Chamber/ health provider’s home
- 12. others (specify ).....

|  |  |
|--|--|
|  |  |
|  |  |
|  |  |

10. Who treated the patinet ? (Multiple response)

- 01.Doctor (MBBS) 02. Nurse 03. Family welfare visitor (FWV)
- 04. Community skill birth attendent (CSBA) 05. MA/ SACMO
- 06. Health assistant( HA) 07. Family welfare assistant (FWA)
- 08. Village doctor 09. NGO worker 10.Others (specify ).....

|  |  |
|--|--|
|  |  |
|  |  |
|  |  |



16. Who provide antenatal care? (Multiple response)
- 01.Doctor (MBBS) 02. Nurse 03. Family welfare visitor (FWV)
04. Community skill birth attendent (CSBA) 05. MA/ SACMO
06. Health assistant( HA) 07. Family welfare assistant (FWA)
08. Village doctor 09. NGO worker 10.Others (specify ).....
17. Total number of delivered baby (para):
18. Total number of abortion ( if not know/ applicable, write code 99)
19. How many months of preganncy at the time of still birth ? ( In month)
- (If don't know write code 99)
20. Place of death?
01. At home 02. Community clinic 03. Union health and family welfate centre
04. Upazila Health complex 05. Maternal and child welfare centere
06. Distrcit or sadar hosapital 07. Medical college hospital 08. Privat clinic
09. Privat hospital 10. NGO clinic 11. Chamber/ health provider's home
12. others (specify ).....
21. Who delivered the fetus?
- 01.Doctor (MBBS) 02. Nurse 03. Family welfare visitor (FWV)
04. Community skill birth attendent (CSBA) 05. MA/ SACMO
06. Health assistant( HA) 07. Family welfare assistant (FWA)
08. Village doctor 09. NGO worker 10.Others (specify ).....
22. Mode of delivery?
1. Normal 2. Vacume 3. Foceps 4. Caesarean Section 5. others (specify).....
23. Duration of labour ? (In hour / minute)
- (From starting of labour pain upto deliver fetus) Hour / Minute
24. Any complications occured during delivery ?
01. yes 02. no 99. Don't know
- (If answer is "no" or "not know" then go to question no. 25)*

24 (a). What were those complications ? (Multiple response)

1. yes 2. no (Mention the underline complications)

- a. Convulsions
- b. Severe bleeding
- c. Prolonged labour
- d. Obstructed labour
- e. Premature rupture of membrane
- f. Abnormal presentation ( hand, leg prolapse)
- g. Retain Placenta
- h. others (specify ).....

|  |
|--|
|  |
|  |
|  |
|  |
|  |
|  |
|  |
|  |

25. Any complication occurred after delivery ? (Multiple response)

1. yes 2. no (Mention the underline complications)

- a. Haemorrhage
- b. High fever
- c. Jaundice
- d. Convulsion (Eclampsia)
- e. Sepsis
- f. Rupture uterus
- g. Retain placenta
- h. Sudden unconsciousness
- i. Other, specify.....

|  |
|--|
|  |
|  |
|  |
|  |
|  |
|  |
|  |
|  |
|  |

26. Did mother received any postnatal care?

01. yes 02. No 99. Not known/ not applicable (if delivery at hospital)

|  |  |
|--|--|
|  |  |
|--|--|

27. If yes, then how long after delivery (days/ hours)

|  |  |  |  |
|--|--|--|--|
|  |  |  |  |
|--|--|--|--|

28. From where mother received post natal care ? (Multiple response)

- 01. At home 02. Community clinic 03. Union health and family welfare centre
- 04. Upazila Health complex 05. Maternal and child welfare center
- 06. District or sadar hospital 07. Medical college hospital 08. Private clinic
- 09. Private hospital 10. NGO clinic 11. Chamber/ health provider's home

|  |  |
|--|--|
|  |  |
|  |  |
|  |  |

12. others (specify ).....

29. Who provided postnatal care?

01. Doctor (MBBS) 02. Nurse 03. Family welfare visitor (FWV)

|  |  |
|--|--|
|  |  |
|--|--|

04. Community skill birth attendent (CSBA) 05. MA/ SACMO

|  |  |
|--|--|
|  |  |
|--|--|

06. Health assistant( HA) 07. Family welfare assistant (FWA)

|  |  |
|--|--|
|  |  |
|--|--|

08. Village doctor 09. NGO worker 10. Others (specify ).....
